# Supplementary material for: Association between body mass index and in vitro fertilization/intra-cytoplasmic sperm injection outcomes: An analysis of 15,124 normal ovarian responders in China
Source: PubMed Central journal article supplement — Chin Med J (Engl). 2024 Mar 18;137(7):837–45. doi: 10.1097/CM9.0000000000002992 (PMC10997229; doi:10.1097/cm9.0000000000002992), 2024-03-18
Supplement: cm9-137-837-s001.pdf [file cm9-137-837-s001.pdf]

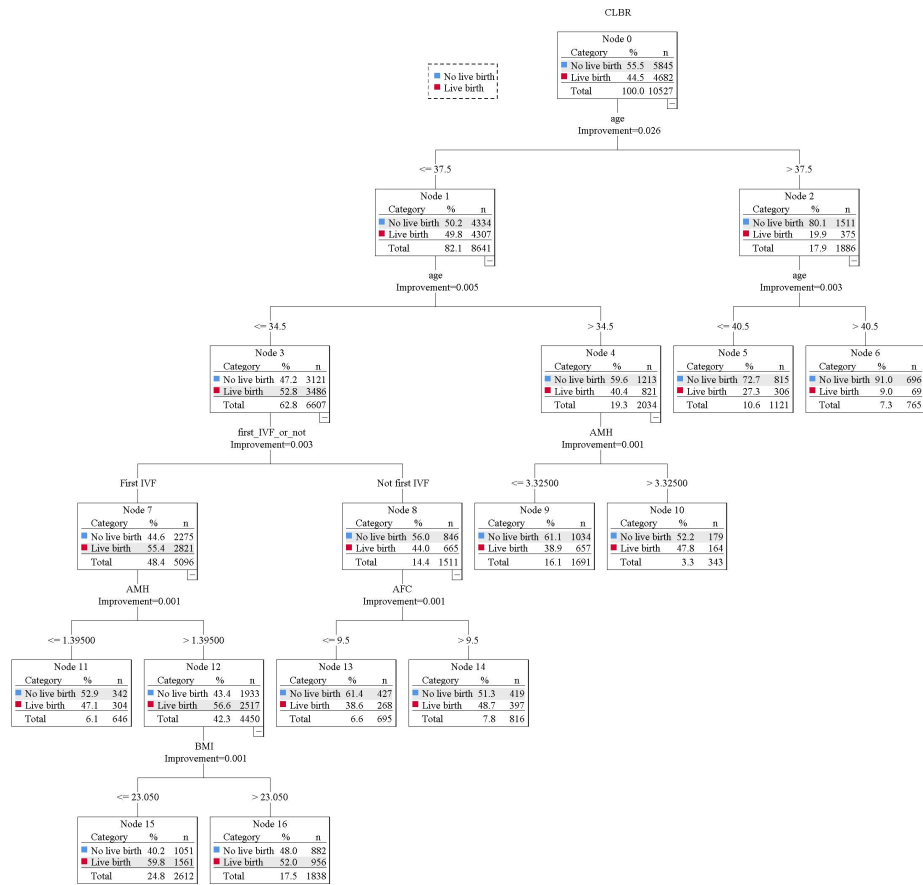

Supplementary Figure 1. Decision tree: the first-visit characteristics model.

**Supplementary Table 1: Characteristics, ovarian stimulation treatments, and oocyte/embryo parameters by BMI category.**

| Characteristics                 | Underweight<br>( <i>n</i> = 1094) | Normal<br>( <i>n</i> = 9120) | Overweight<br>( <i>n</i> = 3530) | Obese<br>( <i>n</i> = 1380) | <i>H/χ</i> <sup>2</sup> value | <i>P</i> -value |
|---------------------------------|-----------------------------------|------------------------------|----------------------------------|-----------------------------|-------------------------------|-----------------|
| Characteristics of female       |                                   |                              |                                  |                             |                               |                 |
| Female age                      | 31 (29, 35)                       | 33 (30, 36)                  | 33 (30, 37)                      | 32 (29, 36)                 | 112.47*                       | <0.001          |
| Type of infertility             |                                   |                              |                                  |                             |                               |                 |
| Primary infertility             | 723 (66.1)                        | 5106 (56.0)                  | 1855 (52.5)                      | 772 (55.9)                  | 62.17†                        | <0.001          |
| Secondary infertility           | 371 (33.9)                        | 4014 (44.0)                  | 1675 (47.5)                      | 608 (44.1)                  |                               |                 |
| Duration of infertility, years  | 3 (2, 5)                          | 3 (2, 5)                     | 3 (2, 6)                         | 4 (2, 6)                    | 67.07*                        | <0.001          |
| Gravidity                       | 0 (0, 1)                          | 0 (0, 1)                     | 0 (0, 1)                         | 0 (0, 1)                    | 55.89*                        | <0.001          |
| Parity                          | 0                                 | 0                            | 0                                | 0                           | 47.53*                        | <0.001          |
| The first time for IVF/ICSI     | 778 (71.1)                        | 6402 (70.2)                  | 2518 (71.3)                      | 958 (69.4)                  | 2.53†                         | 0.469           |
| Characteristics of male partner |                                   |                              |                                  |                             |                               |                 |

|                               |                      |                      |                      |                      |         |        |
|-------------------------------|----------------------|----------------------|----------------------|----------------------|---------|--------|
| Male age                      | 33 (29, 36)          | 34 (30, 38)          | 34 (30, 38)          | 34 (30, 37)          | 54.27*  | <0.001 |
| Male BMI                      | 24.61 (22.49, 26.87) | 25.11 (22.86, 27.55) | 25.54 (23.30, 27.92) | 25.71 (23.47, 28.34) | 76.17*  | <0.001 |
| Basic evaluation              |                      |                      |                      |                      |         |        |
| Basal FSH, IU/L               | 6.00 (2.31, 7.92)    | 5.39 (2.48, 7.43)    | 5.38 (3.28, 7.08)    | 5.33 (3.10, 6.86)    | 8.78*   | 0.032  |
| Basal T, nmol/L               | <0.69 (<0.69, 0.77)  | <0.69 (<0.69, 0.74)  | <0.69 (<0.69, 0.89)  | <0.69 (<0.69, 0.98)  | 90.22*  | <0.001 |
| Basal A <sub>2</sub> , nmol/L | 5.39 (3.99, 7.35)    | 5.29 (3.85, 7.14)    | 5.46 (3.89, 7.70)    | 6.27 (4.31, 8.79)    | 57.67*  | <0.001 |
| Basal endometrial thickness   | 5 (4, 6)             | 5 (4, 6)             | 5 (4, 6)             | 5 (5, 6)             | 9.10*   | 0.028  |
| AMH                           | 2.45 (1.36, 3.73)    | 2.22 (1.30, 3.74)    | 2.26 (1.26, 4.01)    | 2.26 (1.31, 3.95)    | 2.43*   | 0.488  |
| AFC                           | 9 (7, 13)            | 9 (7, 12)            | 10 (7, 14)           | 12 (8, 16)           | 216.51* | <0.001 |
| Diagnosis of infertility      |                      |                      |                      |                      |         |        |
| PCOS‡                         | 51 (4.7)             | 599 (6.6)            | 500 (14.2)           | 332 (24.1)           | 533.93† | <0.001 |
| Tube factor                   | 385 (35.2)           | 3382 (37.1)          | 1411 (40.0)          | 541 (39.2)           | 13.39†  | 0.004  |
| Endometriosis                 | 110 (10.1)           | 709 (7.8)            | 180 (5.1)            | 44 (3.2)             | 75.25†  | <0.001 |

|                             |            |             |             |            |        |        |
|-----------------------------|------------|-------------|-------------|------------|--------|--------|
| Uterine factor <sup>s</sup> | 89 (8.1)   | 1021 (11.2) | 456 (12.9)  | 157 (11.4) | 19.99† | <0.001 |
| Male factor                 | 534 (48.8) | 4135 (45.3) | 1591 (45.1) | 604 (43.8) | 6.79†  | 0.079  |

### Ovarian stimulation

#### Protocol

|                                       |                             |                            |                            |                            |         |        |
|---------------------------------------|-----------------------------|----------------------------|----------------------------|----------------------------|---------|--------|
| GnRH-a long protocol                  | 340 (31.1)                  | 2787 (30.6)                | 995 (28.2)                 | 377 (27.3)                 | 25.31†  | 0.013  |
| GnRH-a prolonged protocol             | 158 (14.4)                  | 1395 (15.3)                | 486 (13.8)                 | 194 (14.1)                 |         |        |
| GnRH-a short flare protocol           | 31 (2.8)                    | 279 (3.1)                  | 124 (3.5)                  | 41 (3.0)                   |         |        |
| GnRH-a ultrashort flare protocol      | 14 (1.3)                    | 112 (1.2)                  | 40 (1.1)                   | 15 (1.1)                   |         |        |
| GnRH antagonist protocol              | 551 (50.4)                  | 4547 (49.9)                | 1885 (53.4)                | 753 (54.6)                 |         |        |
| Stimulation duration, days            | 11 (10, 13)                 | 11 (10, 13)                | 11 (10, 13)                | 12 (10, 13)                | 76.17*  | <0.001 |
| Total gonadotropin dose, IU           | 2550 (1840.62, 3450)        | 2775 (2000, 3650)          | 2850 (2100, 3675)          | 2925 (2175, 3750)          | 71.59*  | <0.001 |
| E <sub>2</sub> on trigger day, pmol/L | 6942.00 (5183.00, 11276.75) | 6147.00 (4504.00, 9699.00) | 5514.00 (3990.00, 8006.00) | 5562.00 (3938.75, 7821.00) | 295.06* | <0.001 |

|                                          |                   |                   |                   |                   |         |        |
|------------------------------------------|-------------------|-------------------|-------------------|-------------------|---------|--------|
| LH on trigger day, IU/L                  | 1.06 (0.58, 1.99) | 1.04 (0.58, 2.12) | 1.09 (0.59, 2.32) | 1.13 (0.55, 2.41) | 8.54*   | 0.036  |
| P on trigger day, nmol/L                 | 2.52 (1.87, 3.37) | 2.20 (1.58, 2.97) | 1.92 (1.34, 2.64) | 1.79 (1.22, 2.55) | 426.61* | <0.001 |
| Endometrial thickness on trigger day, mm | 11 (10, 12)       | 11 (10, 12)       | 11 (10, 12)       | 11 (10, 12)       | 1.90*   | 0.594  |
| Endometrial pattern on trigger day       |                   |                   |                   |                   |         |        |
| A                                        | 992 (91.2)        | 8016 (88.5)       | 2997 (85.5)       | 1139 (83.0)       | 62.07†  | <0.001 |
| A-B                                      | 3 (0.3)           | 27 (0.3)          | 16 (0.5)          | 10 (0.7)          |         |        |
| B                                        | 93 (8.5)          | 1018 (11.2)       | 494 (14.1)        | 223 (16.3)        |         |        |
| Oocyte/embryo parameters                 |                   |                   |                   |                   |         |        |
| Oocytes retrieved, <i>n</i>              | 10 (8, 12)        | 10 (7, 12)        | 10 (7, 12)        | 9 (7, 12)         | 19.43*  | <0.001 |
| Insemination method                      |                   |                   |                   |                   |         |        |
| IVF                                      | 654 (59.8)        | 5593 (61.4)       | 2192 (62.1)       | 906 (65.7)        | 11.79†  | 0.067  |
| ICSI                                     | 434 (39.7)        | 3480 (38.2)       | 1319 (37.4)       | 467 (33.9)        |         |        |
| IVF + ICSI                               | 6 (0.5)           | 43 (0.5)          | 17 (0.5)          | 6 (0.4)           |         |        |

|                                |          |          |          |          |        |       |
|--------------------------------|----------|----------|----------|----------|--------|-------|
| 2PN zygotes, <i>n</i>          | 5 (4, 8) | 6 (4, 8) | 5 (4, 7) | 5 (4, 8) | 11.97* | 0.007 |
| Transferable embryos, <i>n</i> | 3 (2, 4) | 3 (2, 4) | 3 (2, 4) | 3 (2, 4) | 5.72*  | 0.126 |
| Frozen embryos, <i>n</i>       | 1 (0, 3) | 1 (0, 3) | 1 (0, 2) | 1 (0, 2) | 7.53*  | 0.057 |

---

Data are presented as *n* (%) or median (Q1, Q3).

\*Refers to *H* value tested by Kruskal–Wallis H test, and † refers to  $\chi^2$  value tested by Pearson  $\chi^2$  test

‡PCOS was diagnosed according to Rotterdam criteria. §Uterine factor included the adenomyosis, fibroids, endometrial hyperplasia, intrauterine adhesion, thin endometrium, and malformation. 2PN: 2 pronuclear; A<sub>2</sub>: Androstenedione; AFC: Antral follicle count; AMH: Anti-Müllerian hormone; BMI: Body mass index; E<sub>2</sub>: Estradiol; FSH: Follicle-stimulating hormone; GnRH-a: Gonadotropin-releasing hormone agonist; ICSI: Intra-cytoplasmic sperm injection; IVF: *In vitro* fertilization; LH: Luteinizing hormone; P: Progesterone; PCOS: Polycystic ovary syndrome; T: Testosterone.

**Supplementary Table 2: Logistic regression analysis for cumulative outcomes in different subgroups.**

| Cumulative outcomes                | PCOS (n = 1482)* |                     |         |                     | Not PCOS (n = 13,642) |                     |         |                     | First IVF/ICSI (n = 10,656) |                     |         |                     |
|------------------------------------|------------------|---------------------|---------|---------------------|-----------------------|---------------------|---------|---------------------|-----------------------------|---------------------|---------|---------------------|
|                                    | Overweight†      |                     | Obese†  |                     | Overweight†           |                     | Obese†  |                     | Overweight†                 |                     | Obese†  |                     |
|                                    | P-value          | OR (95% CI)         | P-value | OR (95% CI)         | P-value               | OR (95% CI)         | P-value | OR (95% CI)         | P-value                     | OR (95% CI)         | P-value | OR (95% CI)         |
| Cumulative positive pregnancy test | 0.825            | 0.959 (0.661–1.391) | 0.395   | 0.830 (0.540–1.276) | 0.031                 | 0.872 (0.771–0.987) | 0.028   | 0.807 (0.666–0.977) | 0.159                       | 0.905 (0.788–1.040) | 0.038   | 0.805 (0.657–0.988) |
| Cumulative clinical pregnancy      | 0.823            | 0.959 (0.666–1.381) | 0.496   | 0.864 (0.567–1.317) | 0.028                 | 0.871 (0.771–0.985) | 0.003   | 0.753 (0.623–0.911) | 0.190                       | 0.913 (0.797–1.046) | 0.008   | 0.762 (0.623–0.932) |
| Cumulative live birth              | 0.808            | 0.956 (0.666–1.373) | 0.179   | 0.749 (0.491–1.142) | 0.038                 | 0.878 (0.776–0.993) | <0.001  | 0.702 (0.580–0.851) | 0.101                       | 0.893 (0.781–1.022) | <0.001  | 0.674 (0.551–0.825) |
| Premature delivery                 | 0.441            | 1.296 (0.671–2.503) | 0.320   | 1.497 (0.676–3.317) | 0.015                 | 1.336 (1.057–1.689) | 0.001   | 1.806 (1.276–2.557) | 0.007                       | 1.397 (1.097–1.779) | 0.053   | 1.440 (0.996–2.083) |
| Cesarean section                   | <0.001           | 3.608 (1.954–6.663) | 0.002   | 3.253 (1.515–6.985) | <0.001                | 1.718 (1.408–2.096) | <0.001  | 1.995 (1.425–2.793) | <0.001                      | 1.974 (1.601–2.434) | <0.001  | 2.008 (1.440–2.800) |
| LGA‡                               | 0.079            | 1.980 (0.923–4.248) | 0.060   | 2.360 (0.965–5.774) | 0.001                 | 1.447 (1.152–1.817) | <0.001  | 2.074 (1.484–2.900) | 0.001                       | 1.493 (1.171–1.905) | 0.001   | 1.863 (1.303–2.663) |
| SGA‡                               | 0.402            | 0.373 (0.037–3.747) | 0.984   | 0 (0–0)             | 0.410                 | 1.181 (0.795–1.753) | 0.519   | 1.226 (0.659–2.282) | 0.444                       | 1.182 (0.770–1.815) | 0.840   | 0.927 (0.443–1.939) |

Adjusted by female age, type of infertility, duration of infertility, gravidity, parity, male BMI, male age, basal FSH, AFC, PCOS, tube factor,

endometriosis, uterine factor, ovarian stimulation protocol, stimulation duration, total gonadotropin dose, endometrial pattern, E<sub>2</sub>, LH, and P on trigger day, number of oocytes retrieved, number of 2PN zygotes, number of transferable embryos, number of frozen embryos, number of embryos transferred in fresh cycle, day of embryos transfer in fresh cycle.

\*PCOS was diagnosed according to Rotterdam criteria.

†In each subgroup (e.g., patients with PCOS), overweight and obesity groups were both calculated with reference of normal weight group.

‡Rates of LGA and SGA were both calculated with reference of the rate of appropriate for gestational age.

2PN: 2 pronuclear; AFC: Antral follicle count; BMI: Body mass index; FSH: Follicle-stimulating hormone; ICSI: Intra-cytoplasmic sperm injection; IVF: *In vitro* fertilization; LGA: Large for gestational age; PCOS: Polycystic ovary syndrome; SGA: Small for gestational age.
